# Supplementary material for: Evidence of Borrelia theileri in Wild and Domestic Animals in the Kafue Ecosystem of Zambia
Source: MDPI journal article supplement (doi:10.3390/microorganisms9112405), 2021-11-22
Supplement: s1 [file s1]

Supplemental Table S1. Accession numbers of the obtained DNA sequences in this study

| Species | Sample ID | Ct value | <i>flaB</i> | 16S rDNA | <i>hpt</i> |
|---------|-----------|----------|-------------|----------|------------|
| Impala  | W2        | 27.87    | LC656216    | LC656236 | LC656259   |
| Impala  | W3        | 36       | LC656217    | n.a.     | LC656260   |
| Impala  | W27       | 33.1     | LC656218    | n.a.     | LC656261   |
| Impala  | W97       | 31       | LC656219    | LC656237 | LC656262   |
| Impala  | W106      | 34.16    | n.a.        | n.a.     | n.a.       |
| Cattle  | B5        | 33.12    | LC656227    | LC656242 | LC656253   |
| Cattle  | B8        | 33.26    | LC656228    | n.a.     | LC656254   |
| Cattle  | B13       | 35.03    | LC656229    | n.a.     | n.a.       |
| Cattle  | B30       | 35.65    | n.a.        | n.a.     | n.a.       |
| Cattle  | B33       | 30.7     | LC656230    | LC656241 | LC656255   |
| Cattle  | B36       | 32.79    | LC656231    | LC656240 | LC656256   |
| Cattle  | B38       | 34.32    | LC656232    | LC656239 | LC656257   |
| Cattle  | B39       | 29.11    | LC656233    | LC656238 | LC656258   |
| Cattle  | B44       | 32.22    | LC656234    | n.a.     | n.a.       |
| Cattle  | B106      | 34.66    | LC656235    | n.a.     | n.a.       |
| Cattle  | I16       | 27.6     | LC656223    | LC656246 | LC656249   |
| Cattle  | I29       | 34.94    | n.a.        | n.a.     | n.a.       |
| Cattle  | I64       | 35.9     | n.a.        | n.a.     | n.a.       |
| Cattle  | I82       | 35.26    | LC656224    | LC656245 | LC656250   |
| Cattle  | K23       | 30.31    | LC656221    | n.a.     | n.a.       |
| Cattle  | K83       | 33.98    | LC656222    | n.a.     | n.a.       |
| Cattle  | NN8       | 33.48    | LC656225    | LC656244 | LC656252   |
| Cattle  | NN31      | 35.22    | n.a.        | n.a.     | n.a.       |
| Cattle  | NN34      | 28.52    | LC656226    | LC656243 | LC656251   |
| Cattle  | Nt26      | 29.63    | LC656220    | LC656247 | LC656248   |

n.a.: not applicable
